# Supplementary material for: Siglec-9+ tumor-associated macrophages delineate an immunosuppressive subset with therapeutic vulnerability in patients with high-grade serous ovarian cancer
Source: PubMed Central journal article supplement — J Immunother Cancer. 2023 Sep 13;11(9):e007099. doi: 10.1136/jitc-2023-007099 (PMC10503378; doi:10.1136/jitc-2023-007099), 2023-09-13
Supplement: jitc-2023-007099supp011.pdf [file jitc-2023-007099supp011.pdf]

A

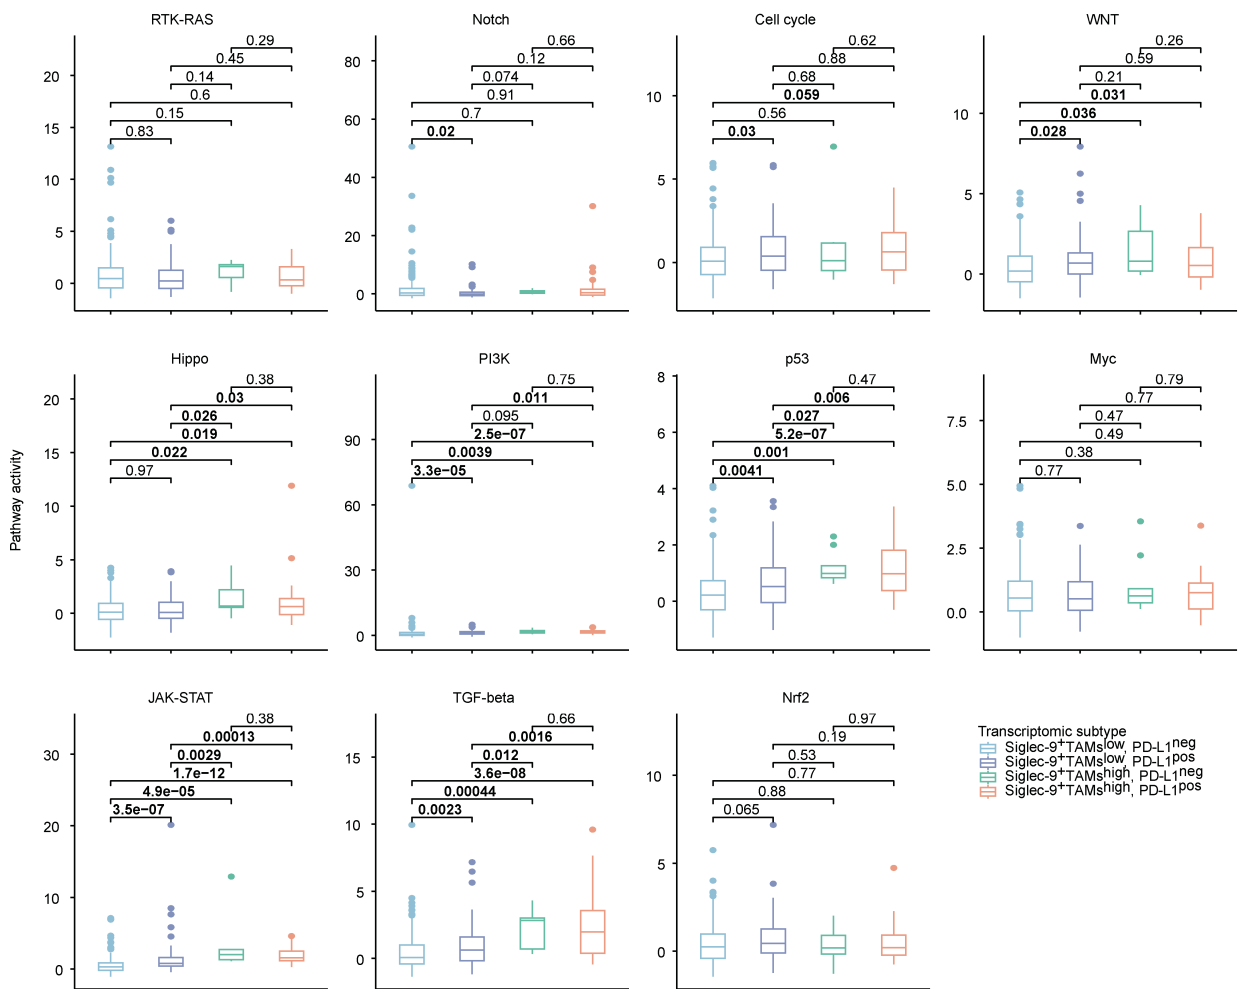

B

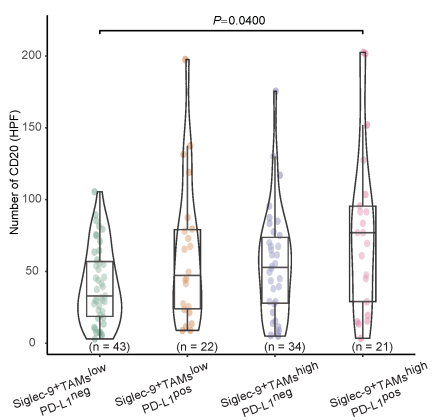

C

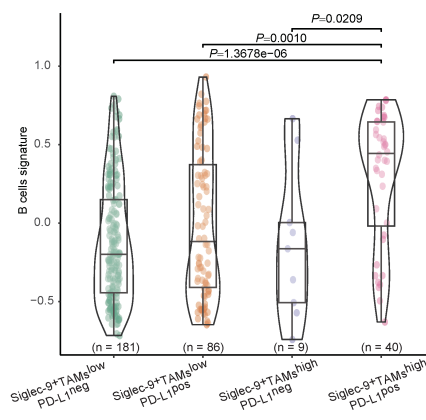

D

| Siglec-9 <sup>+</sup> TAMs subtypes | Low Siglec-9 <sup>+</sup> TAMs                                           |                        | High Siglec-9 <sup>+</sup> TAMs                            |                                                                                                                                                                                                                                                                | PD-L1 subtypes |          |
|-------------------------------------|--------------------------------------------------------------------------|------------------------|------------------------------------------------------------|----------------------------------------------------------------------------------------------------------------------------------------------------------------------------------------------------------------------------------------------------------------|----------------|----------|
|                                     | PD-L1 subtypes                                                           |                        | PD-L1 subtypes                                             |                                                                                                                                                                                                                                                                |                |          |
| Shared features                     | TP53 mutations                                                           |                        |                                                            |                                                                                                                                                                                                                                                                | Negative       | Positive |
| Particular features                 | CCND2 amp<br>MLH1 mut<br>MAML2 & MYC mut & exp<br>Notch pathway activity | Nrf2 pathway activity  | Siglec-9 exp<br>WNT & HIPPO pathway activity               | Siglec-9 exp<br>KRAS mut<br>Cell cycle & JAK-STAT & TGFβ & ATR/BRCA & Antigen presenting machinery & EGF & VEGF & Immune checkpoint & DNA damage immune response & IFN-γ response pathway activity<br>Tertiary lymphoid structures pathway activity<br>B cells | Negative       | Positive |
| Possible therapies                  | BET inhibitor<br>Notch inhibitor                                         | Nrf2 pathway inhibitor | Siglec-9 targeted therapy<br>WNT & HIPPO pathway inhibitor | Immune checkpoint inhibition + anti-TGFβ<br>JAK-STAT inhibitor<br>Siglec-9 targeted therapy                                                                                                                                                                    | Negative       | Positive |
