# Supplementary material for: Siglec-9+ tumor-associated macrophages delineate an immunosuppressive subset with therapeutic vulnerability in patients with high-grade serous ovarian cancer
Source: PubMed Central journal article supplement — J Immunother Cancer. 2023 Sep 13;11(9):e007099. doi: 10.1136/jitc-2023-007099 (PMC10503378; doi:10.1136/jitc-2023-007099), 2023-09-13
Supplement: jitc-2023-007099supp012.pdf [file jitc-2023-007099supp012.pdf]

Supplementary Table 1. Patient characteristics and relationship with Siglec-9+TAMs infiltration.

| Characteristics            | Fudan cohort (n =120) |      |                                 |                     |       | TCGA (n =316) |      |                         |                 |                 | Fresh HGSC tissues (n =40) |      |                                 |                |       |
|----------------------------|-----------------------|------|---------------------------------|---------------------|-------|---------------|------|-------------------------|-----------------|-----------------|----------------------------|------|---------------------------------|----------------|-------|
|                            | Patients              |      | Siglec-9+TAMs cell infiltration |                     | P     | Patients      |      | Siglec-9+TAMs signature |                 | P               | Patients                   |      | Siglec-9+TAMs cell infiltration |                | P     |
|                            | No.                   | %    | Low (<2 cells/HPF)              | High (≥2 cells/HPF) |       | No.           | %    | Low (≤6.94478)          | High (>6.94478) |                 | No.                        | %    | Low (≤median)                   | High (>median) |       |
| <b>Total</b>               | 120                   | 100  | 65                              | 55                  | -     | 316           | 100  | 49                      | 267             | -               | 40                         | 100  | 20                              | 20             | -     |
| <b>Age (years)</b>         |                       |      |                                 |                     | 0.855 |               |      |                         |                 | 0.415           |                            |      |                                 |                | 0.425 |
| <60                        | 60                    | 50   | 33                              | 27                  |       | 162           | 51.3 | 140                     | 22              |                 | 25                         | 62.5 | 15                              | 10             |       |
| ≥60                        | 60                    | 50   | 32                              | 28                  |       | 154           | 48.7 | 127                     | 27              |                 | 15                         | 37.5 | 5                               | 10             |       |
| <b>Tumor residual (mm)</b> |                       |      |                                 |                     | 0.064 |               |      |                         |                 | 0.375           |                            |      |                                 |                | 0.791 |
| No macroscopic disease     | 45                    | 37.5 | 30                              | 15                  |       | 57            | 18.0 | 50                      | 7               |                 | 26                         | 65   | 12                              | 14             |       |
| <10                        | 47                    | 39.2 | 24                              | 23                  |       | 150           | 47.5 | 122                     | 28              |                 | 11                         | 27.5 | 6                               | 5              |       |
| ≥10                        | 28                    | 23.3 | 11                              | 17                  |       | 79            | 25.0 | 67                      | 12              |                 | 3                          | 7.5  | 2                               | 1              |       |
| Unknown                    | 0                     | 0    | 0                               | 0                   |       | 30            | 9.5  | 28                      | 2               |                 | 0                          | 0    | 0                               | 0              |       |
| <b>Lymph node invasion</b> |                       |      |                                 |                     | 0.735 |               |      |                         |                 | -               |                            |      |                                 |                | 0.590 |
| No Metastasis              | 91                    | 75.8 | 48                              | 43                  |       | -             | -    | -                       | -               |                 | 14                         | 35   | 8                               | 6              |       |
| Metastasis                 | 29                    | 24.2 | 17                              | 12                  |       | -             | -    | -                       | -               |                 | 13                         | 32.5 | 5                               | 8              |       |
| Unknown                    | 0                     | 0    | 0                               | 0                   |       | -             | -    | -                       | -               |                 | 13                         | 32.5 | 7                               | 6              |       |
| <b>FIGO stage</b>          |                       |      |                                 |                     | 0.498 |               |      |                         |                 | 0.494           |                            |      |                                 |                | 0.810 |
| I                          | 9                     | 7.5  | 7                               | 2                   |       | 1             | 0.3  | 1                       | 0               |                 | 2                          | 5    | 1                               | 1              |       |
| II                         | 17                    | 14.2 | 8                               | 9                   |       | 14            | 4.4  | 10                      | 4               |                 | 5                          | 12.5 | 2                               | 3              |       |
| III                        | 80                    | 66.7 | 43                              | 37                  |       | 256           | 81   | 217                     | 39              |                 | 24                         | 60   | 11                              | 13             |       |
| IV                         | 14                    | 11.7 | 7                               | 7                   |       | 45            | 14.2 | 39                      | 6               |                 | 9                          | 22.5 | 6                               | 3              |       |
| <b>Siglec-9 ligand</b>     |                       |      |                                 |                     |       |               |      |                         |                 | -               |                            |      |                                 |                | -     |
| Low                        | 53                    | 16.8 | 29                              | 24                  |       | -             | -    | -                       | -               |                 | -                          | -    | -                               | -              |       |
| High                       | 67                    | 21.2 | 36                              | 31                  |       | -             | -    | -                       | -               |                 | -                          | -    | -                               | -              |       |
| <b>PD-L1</b>               |                       |      |                                 |                     | 0.762 |               |      |                         |                 | <b>2.36E-10</b> |                            |      |                                 |                | -     |
| Negative                   | 77                    | 24.4 | 43                              | 34                  |       | 190           | 60.1 | 181                     | 9               |                 | -                          | -    | -                               | -              |       |
| Positive                   | 43                    | 13.6 | 22                              | 21                  |       | 126           | 39.9 | 86                      | 40              |                 | -                          | -    | -                               | -              |       |

Abbreviations:

P values were calculated using the Chi-square test; significant P value &lt; 0.05 was shown in bold.
