# Supplementary material for: Siglec-9+ tumor-associated macrophages delineate an immunosuppressive subset with therapeutic vulnerability in patients with high-grade serous ovarian cancer
Source: PubMed Central journal article supplement — J Immunother Cancer. 2023 Sep 13;11(9):e007099. doi: 10.1136/jitc-2023-007099 (PMC10503378; doi:10.1136/jitc-2023-007099), 2023-09-13
Supplement: jitc-2023-007099supp013.pdf [file jitc-2023-007099supp013.pdf]

**Supplementary Table 2. Immunohistochemistry antibodies.**

| No. | Identified cells       | Antibody name                    | Clonality | Species | Company              | Product No. | Diluted | IHC scoring method             |
|-----|------------------------|----------------------------------|-----------|---------|----------------------|-------------|---------|--------------------------------|
| 1   | M2-like TAMs           | Anti-CD163 antibody              | Rabbit    |         | Cell Signaling Techn | 93498S      | 1:400   | Cell number (200x)             |
| 2   | B cells                | Anti-CD20 antibody               | Rabbit    |         | Invitrogen           | PA5-16701   | 1:800   | Cell number (200x)             |
| 3   | PD-L1+ cells           | Anti-CD274 antibody              | Rabbit    |         | Sigma                | SAB4301882  | 1:20    | Cell percentage (per specimen) |
| 4   | T cells                | Anti-CD3 antibody                | Rabbit    |         | Cell Signaling Techn | 85061S      | 1:600   | Cell number (200x)             |
| 5   | CD4+ T cells           | Anti-CD4 antibody                | Rabbit    |         | Sigma                | HPA004252   | 1:600   | Cell number (200x)             |
| 6   | NK cells               | Anti-CD56 antibody               | Mouse     |         | Invitrogen           | 07-5603     | 1:800   | Cell number (200x)             |
| 7   | Neutrophils            | Anti-CD66b antibody              | Mouse     |         | Bio Legend           | 392902      | 1:400   | Cell number (200x)             |
| 8   | TAMs                   | Anti-CD68 antibody               | Mouse     |         | Abcam                | AB955       | 1:400   | Cell number (200x)             |
| 9   | CD8+ T cells           | Anti-CD8 antibody                | Mouse     |         | Cell Signaling Techn | 70306S      | 1:900   | Cell number (200x)             |
| 10  | CTLA-4+ cells          | Anti-CTLA-4 antibody             | Rabbit    |         | Sigma                | SAB1306189  | 1:1500  | Cell number (200x)             |
| 11  | Tregs                  | Anti-FOXP3 antibody              | Mouse     |         | Bio Legend           | 320201      | 1:500   | Cell number (200x)             |
| 12  | Th2 cells              | Anti-GATA3 antibody              | Rabbit    |         | Abcam                | AB199428    | 1:250   | Cell number (200x)             |
| 13  | GZMB+ cells            | Anti-GZMB antibody               | Rabbit    |         | Cell Signaling Techn | 44153S      | 1:500   | Cell number (200x)             |
| 14  | IFN- $\gamma$ + cells  | Anti-IFN-gamma antibody          | Mouse     |         | Abcam                | AB218426    | 1:400   | Cell number (200x)             |
| 15  | IL-10+ cells           | Anti-IL-10 antibody              | Rabbit    |         | Novus                | JES3-12G8   | 1:10    | Cell number (200x)             |
| 16  | LAG-3+ cells           | Anti-LAG-3 antibody              | Rabbit    |         | Sigma                | HPA013967   | 1:1200  | Cell number (200x)             |
| 17  | Mast cells             | Anti-mast cell tryptase antibody | Mouse     |         | Abcam                | AB2378      | 1:10000 | Cell number (200x)             |
| 18  | PD-1+ cells            | Anti-PDCD1 antibody              | Rabbit    |         | Sigma                | HPA035981   | 1:100   | Cell number (200x)             |
| 19  | Perforin+ cells        | Anti-Perforin antibody           | Mouse     |         | Abcam                | AB47225     | 1:200   | Cell number (200x)             |
| 20  | Siglec-9+ cells        | Anti-Siglec-9 antibody           | Rabbit    |         | Abcam                | ab197981    | 1:50    | Cell number (200x)             |
| 21  | Siglec-9 Ligand+ cells | Anti-Siglec-9 ligand antibody    | Mouse     |         | R&D Systems          | 1139-SL-050 | 5 ug/mL | IHC score                      |
| 22  | Th1 cells              | Anti-T-bet antibody              | Rabbit    |         | Abcam                | AB150440    | 1:250   | Cell number (200x)             |
| 23  | TGF- $\beta$ 1+ cells  | Anti-TGF- $\beta$ 1 antibody     | Rabbit    |         | Sigma                | SAB4502954  | 1:500   | Cell number (200x)             |
| 24  | TIM-3+ cells           | Anti-Tim3 antibody               | Mouse     |         | Invitrogen           | MA5-32839   | 1:1200  | Cell number (200x)             |
| 25  | TNF- $\alpha$ + cells  | Anti-TNF-alpha antibody          | Mouse     |         | Abcam                | AB1793      | 1:100   | Cell number (200x)             |
| 26  | VEGFR2+ cells          | Anti-VEGFR2 antibody             | Rabbit    |         | Sigma                | SAB4501645  | 1:400   | Cell number (200x)             |
| 27  | VEGFA+ cells           | Anti-VEGFA antibody              | Rabbit    |         | Sigma                | HPA069116   | 1:200   | Cell number (200x)             |
| 28  | CXCL13+ cells          | CXCL13                           | Goat      |         | R&D                  | AF801       | 1:400   | IHC score                      |
