# Supplementary material for: Siglec-9+ tumor-associated macrophages delineate an immunosuppressive subset with therapeutic vulnerability in patients with high-grade serous ovarian cancer
Source: PubMed Central journal article supplement — J Immunother Cancer. 2023 Sep 13;11(9):e007099. doi: 10.1136/jitc-2023-007099 (PMC10503378; doi:10.1136/jitc-2023-007099), 2023-09-13
Supplement: jitc-2023-007099supp014.pdf [file jitc-2023-007099supp014.pdf]

**Supplementary Table 3. Flow cytometry antibodies.**

| No. | Marker                               | Antibody name                                      | Company     | Host             | Product No. | Dye              |
|-----|--------------------------------------|----------------------------------------------------|-------------|------------------|-------------|------------------|
| 1   | Active Caspase-3                     | V450 anti-human Active Caspase-3                   | BD          | Domestic rabbit  | 560627      | V450             |
| 2   | American Hamster IgG Isotype control | PE anti-human American Hamster IgG Isotype control | Biolegend   | Armenian Hamster | 400906      | PE               |
| 3   | Arginase-1                           | Alexa Fluor® 700 anti-human Arginase-1             | Invitrogen  | Rat              | 56-369-782  | Alexa Fluor® 700 |
| 4   | CD11b                                | PE/Cyanine7 anti-human CD11b                       | Biolegend   | Mouse            | 301322      | PE/Cyanine7      |
| 5   | CD11c                                | BV421 anti-human CD11c                             | Biolegend   | Mouse            | 301628      | BV421            |
| 6   | CD163                                | BV785 anti-human CD163                             | Biolegend   | Mouse            | 333632      | BV785            |
| 7   | CD169                                | Brilliant Violet 605 anti-human CD169              | Biolegend   | Mouse            | 346010      | BV650            |
| 8   | CD20                                 | BV650 anti-human CD20                              | Biolegend   | Mouse            | 302336      | BV650            |
| 9   | CD206                                | BV650 anti-human CD206                             | BD          | Mouse            | 751776      | BV650            |
| 10  | CD3                                  | BV785 anti-human CD3                               | Biolegend   | Mouse            | 344842      | BV785            |
| 11  | CD33                                 | PE anti-human CD33 Antibody                        | Biolegend   | Mouse            | 366607      | PE               |
| 12  | CD4                                  | BV605 anti-human CD4                               | Biolegend   | Mouse            | 317438      | BV605            |
| 13  | CD45                                 | PE/Cyanine7 anti-human CD45                        | Biolegend   | Mouse            | 304016      | PE/Cyanine7      |
| 14  | CD68                                 | PerCP/Cyanine5.5 anti-human CD68                   | Biolegend   | Mouse            | 333814      | PerCP/Cyanine5.5 |
| 15  | CD8                                  | PerCP/Cyanine5.5 anti-human CD8                    | Biolegend   | Mouse            | 344710      | PerCP/Cyanine5.5 |
| 16  | CD86                                 | BV421 anti-human CD86                              | Biolegend   | Mouse            | 374212      | BV421            |
| 17  | CTLA-4                               | PE/Cyanine7 anti-human CTLA-4                      | Biolegend   | Mouse            | 369613      | PE/Cyanine7      |
| 18  | FOXP3                                | APC anti-human FOXP3                               | eBioscience | Mouse            | 17-4777-42  | APC              |
| 19  | GZMB                                 | PE/Cyanine7 anti-human GZMB                        | Biolegend   | Mouse            | 372214      | PE/Cyanine7      |
| 20  | HLA-DR                               | FITC anti-human HLA-DR                             | Biolegend   | Mouse            | 307604      | FITC             |
| 21  | IFN-γ                                | PE anti-human IFN-γ                                | Biolegend   | Mouse            | 502509      | PE               |
| 22  | IgG1 Antibody                        | PE/Cyanine7 anti-mouse IgG1 Antibody               | Biolegend   | Rat              | 406613      | PE/Cyanine7      |
| 23  | Ki-67                                | BV421 anti-human Ki-67                             | Biolegend   | Mouse            | 350506      | BV421            |
| 24  | LAG-3                                | BV421 anti-human LAG-3                             | Biolegend   | Mouse            | 369314      | BV421            |
| 25  | PD-1                                 | FITC anti-human PD-1                               | Biolegend   | Mouse            | 329904      | FITC             |
| 26  | PD-L1                                | PE anti-human PD-L1                                | Biolegend   | Mouse            | 329706      | PE               |
| 27  | Perforin                             | Alexa Fluor® 700 anti-human Perforin               | Biolegend   | Mouse            | 353324      | Alexa Fluor® 700 |
| 28  | Siglec-10                            | PE anti-human Siglec-10 Antibody                   | Biolegend   | Mouse            | 347603      | PE               |
| 29  | Siglec-15                            | Purified anti-mouse/human Siglec-15 Antibody       | Biolegend   | Mouse            | 164602      | PE               |
| 30  | Siglec-5                             | PE anti-human CD170 (Siglec-5) Antibody            | Biolegend   | Mouse            | 352003      | PE               |
| 31  | Siglec-7                             | PE anti-human CD328 (Siglec-7) Antibody            | Biolegend   | Mouse            | 339203      | PE               |
| 32  | Siglec-9                             | Alexa Fluor® 647 anti-human Siglec-9               | Biolegend   | Mouse            | 351509      | Alexa Fluor® 647 |
| 33  | Siglec-9                             | PE anti-human Siglec-9                             | Biolegend   | Mouse            | 351504      | PE               |
| 34  | Streptavidin                         | PE anti-human Streptavidin                         | Biolegend   | Rat              | 405204      | PE               |
| 35  | TIM-3                                | PE anti-human TIM-3                                | Biolegend   | Mouse            | 345006      | PE               |
| 36  | TNF-α                                | BV650 anti-human TNF-α                             | Biolegend   | Mouse            | 502938      | BV650            |
