# Supplementary material for: Siglec-9+ tumor-associated macrophages delineate an immunosuppressive subset with therapeutic vulnerability in patients with high-grade serous ovarian cancer
Source: PubMed Central journal article supplement — J Immunother Cancer. 2023 Sep 13;11(9):e007099. doi: 10.1136/jitc-2023-007099 (PMC10503378; doi:10.1136/jitc-2023-007099), 2023-09-13
Supplement: jitc-2023-007099supp015.pdf [file jitc-2023-007099supp015.pdf]

**Supplementary Table 4 Univariable and Multivariate analysis for OS in Fudan Cohort.**

| Variables           | Univariate            |              |             | Multivariate        |              |              |                   |
|---------------------|-----------------------|--------------|-------------|---------------------|--------------|--------------|-------------------|
|                     | P value               | HR           | 95%CI       | P value             | HR           | 95%CI        |                   |
| Age                 |                       |              |             |                     |              |              |                   |
|                     | ≥60 vs. <60           | <b>0.066</b> | <b>1.60</b> | <b>0.97 - 2.64</b>  | 0.280        | 1.333        | 0.79 -2.24        |
| FIGO staging        |                       |              |             |                     |              |              |                   |
|                     | III-IV vs. I-II       | <b>0.001</b> | <b>4.64</b> | <b>1.85 - 11.55</b> | <b>0.009</b> | <b>3.54</b>  | <b>1.37 -9.15</b> |
| Lymph node invasion |                       |              |             |                     |              |              |                   |
|                     | Yes vs. No            | <b>0.025</b> | <b>1.83</b> | <b>1.078 - 3.12</b> | 0.296        | 1.355        | 0.77-2.38         |
| Tumor residual      |                       |              |             |                     |              |              |                   |
|                     | >10mm vs. ≤10mm       | 0.107        | 1.58        | 0.91 - 2.71         |              |              |                   |
| PD-L1               |                       |              |             |                     |              |              |                   |
|                     | Positive vs. Negative | <b>0.007</b> | <b>0.45</b> | <b>0.25 - 0.80</b>  | <b>0.005</b> | <b>0.430</b> | <b>0.24-0.77</b>  |
| Siglec-9+TAMs       |                       |              |             |                     |              |              |                   |
|                     | High vs. Low          | <b>0.048</b> | <b>1.66</b> | <b>1.01 - 2.732</b> | <b>0.048</b> | <b>1.672</b> | <b>1.01-2.78</b>  |
| Siglec-9 ligand     |                       |              |             |                     |              |              |                   |
|                     | High vs. Low          | 0.884        | 0.97        | 0.59 - 1.58         |              |              |                   |
| CD163               |                       |              |             |                     |              |              |                   |
|                     | High vs. Low          | <b>0.037</b> | <b>1.72</b> | <b>1.03 - 2.87</b>  | 0.210        | 1.412        | 0.88-2.43         |
| CD68                |                       |              |             |                     |              |              |                   |
|                     | High vs. Low          | 0.281        | 1.41        | 0.753 - 2.65        |              |              |                   |

**Abbreviations:** HR, Hazard ratio; 95% CI,95% Confidence intervals.

Abbreviation: HR, Hazard Ratio; CI: confidence i

\*Multivariate Cox regression analysis beyond risk score.

Statistically significant data were marked with bold and underline.
