# Supplementary material for: Siglec-9+ tumor-associated macrophages delineate an immunosuppressive subset with therapeutic vulnerability in patients with high-grade serous ovarian cancer
Source: PubMed Central journal article supplement — J Immunother Cancer. 2023 Sep 13;11(9):e007099. doi: 10.1136/jitc-2023-007099 (PMC10503378; doi:10.1136/jitc-2023-007099), 2023-09-13
Supplement: jitc-2023-007099supp016.pdf [file jitc-2023-007099supp016.pdf]

**Supplementary Table 5 Univariable and Multivariate analysis for OS according to Siglec-9+TAMs in Fudan Cohort.**

| Variables                             | Univariate            |              |             | Multivariate       |              |                          |
|---------------------------------------|-----------------------|--------------|-------------|--------------------|--------------|--------------------------|
|                                       | P value               | HR           | 95%CI       | P value            | HR           | 95%CI                    |
| <b>High-expressed Siglec-9 ligand</b> |                       |              |             |                    |              |                          |
| Age                                   | ≥60 vs. <60           | 0.409        | 1.33        | 0.68-2.6           |              |                          |
| FIGO staging                          | III-IV vs. I-II       | <b>0.012</b> | <b>4.60</b> | <b>1.4-15</b>      | <b>0.037</b> | <b>3.74 1.08 - 12.91</b> |
| Lymph node invasion                   | Yes vs. No            | <b>0.008</b> | <b>2.52</b> | <b>1.3-5</b>       | <b>0.034</b> | <b>2.24 1.06 - 4.73</b>  |
| Tumor residual                        | >10mm vs. ≤10mm       | 0.160        | 1.68        | 0.82-3.5           |              |                          |
| PD-L1                                 | Positive vs. Negative | <b>0.013</b> | <b>0.33</b> | <b>0.13-0.79</b>   | <b>0.006</b> | <b>0.28 0.11 - 0.69</b>  |
| Siglec-9+TAMs                         | High vs. Low          | <b>0.047</b> | <b>2.01</b> | <b>1-4</b>         | <b>0.049</b> | <b>2.01 1.00 - 4.02</b>  |
| CD68                                  | High vs. Low          | 0.900        | 1.07        | 0.38 - 3.03        |              |                          |
| CD163                                 | High vs. Low          | <b>0.033</b> | <b>2.29</b> | <b>1.07 - 4.89</b> |              |                          |
| <b>Low-expressed Siglec-9 ligand</b>  |                       |              |             |                    |              |                          |
| Age                                   | ≥60 vs. <60           | <b>0.064</b> | <b>2.03</b> | <b>0.96-4.3</b>    | 0.235        | 1.58 0.74 - 3.38         |
| FIGO staging                          | III-IV vs. I-II       | <b>0.032</b> | <b>4.84</b> | <b>1.1-20</b>      | <b>0.058</b> | <b>4.12 0.95 - 17.88</b> |
| Lymph node invasion                   | Yes vs. No            | 0.746        | 1.17        | 0.45-3.1           |              |                          |
| Tumor residual                        | >10mm vs. ≤10mm       | 0.351        | 1.50        | 0.64-3.5           |              |                          |
| PD-L1                                 | Positive vs. Negative | 0.210        | 0.60        | 0.27-1.3           |              |                          |
| Siglec-9+TAMs                         | High vs. Low          | 0.447        | 1.33        | 0.64-2.8           |              |                          |
| CD68                                  | High vs. Low          | 0.156        | 1.81        | 0.80 - 4.13        |              |                          |
| CD163                                 | High vs. Low          | 0.396        | 1.39        | 0.65-2.95          |              |                          |

**Abbreviations:** HR, Hazard ratio; 95% CI, 95% Confidence intervals.

Abbreviation: HR, Hazard Ratio; CI: confidence interval

\*Multivariate Cox regression analysis beyond risk score.

Statistically significant data were marked with bold and underline.
