# Supplementary material for: Siglec-9+ tumor-associated macrophages delineate an immunosuppressive subset with therapeutic vulnerability in patients with high-grade serous ovarian cancer
Source: PubMed Central journal article supplement — J Immunother Cancer. 2023 Sep 13;11(9):e007099. doi: 10.1136/jitc-2023-007099 (PMC10503378; doi:10.1136/jitc-2023-007099), 2023-09-13
Supplement: jitc-2023-007099supp017.pdf [file jitc-2023-007099supp017.pdf]

**Supplementary Table 6** The transcriptomic data were publicly available.

|   | <b>Accession ID</b> | <b>Source</b>   | <b>Patients</b> |
|---|---------------------|-----------------|-----------------|
| 1 | GSE151214           | Fallopian tubes | <i>n</i> = 3    |
| 2 | GSE154600           | Primary tumor   | <i>n</i> = 3    |
| 3 | GSE146026           | Ascites         | <i>n</i> = 11   |
