# Supplementary figures and images for: Siglec-9+ tumor-associated macrophages delineate an immunosuppressive subset with therapeutic vulnerability in patients with high-grade serous ovarian cancer
Source: PubMed Central journal article supplement — J Immunother Cancer. 2023 Sep 13;11(9):e007099. doi: 10.1136/jitc-2023-007099 (PMC10503378; doi:10.1136/jitc-2023-007099), 2023-09-13

Figure S1

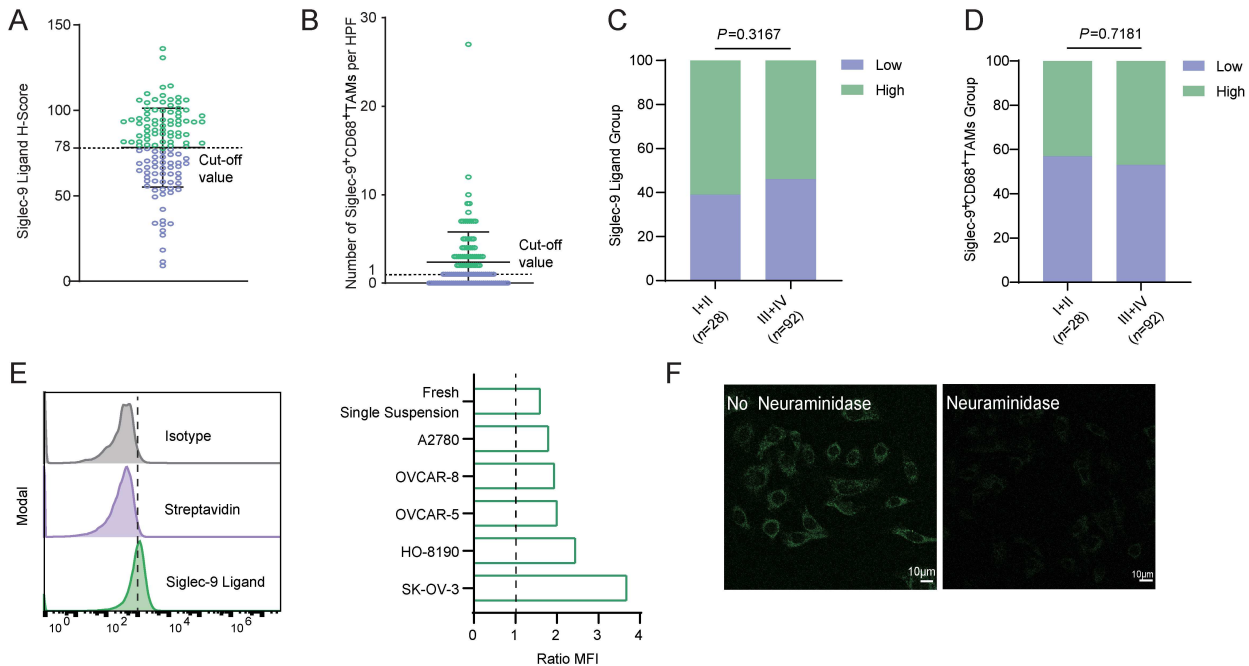

Supplement: jitc-2023-007099supp002.pdf [file jitc-2023-007099supp002.pdf]

Figure S2

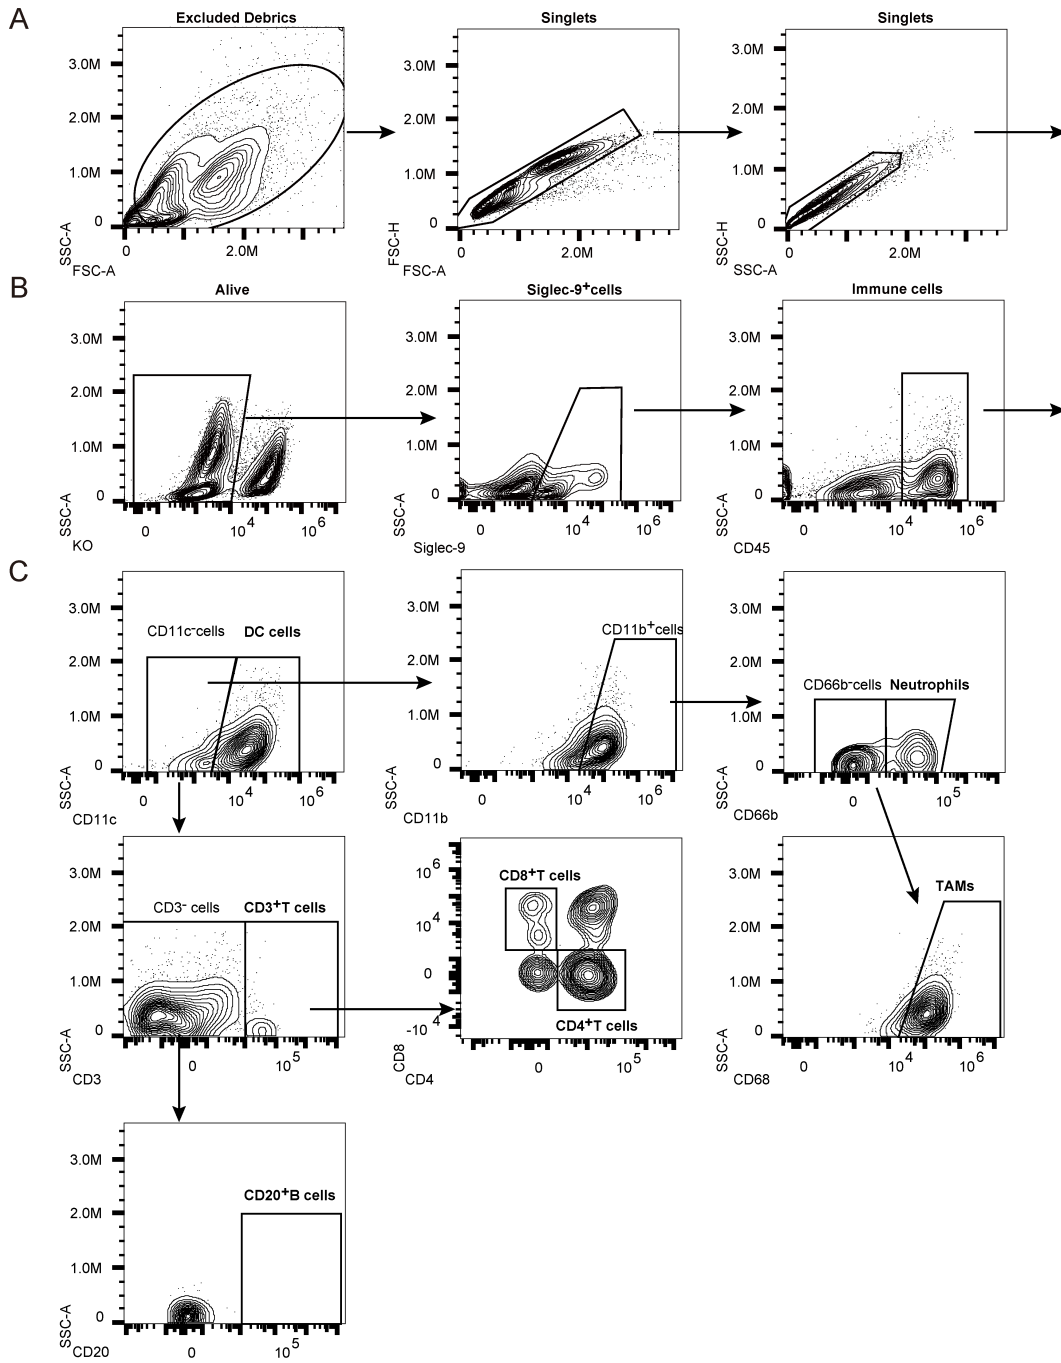

Supplement: jitc-2023-007099supp003.pdf [file jitc-2023-007099supp003.pdf]

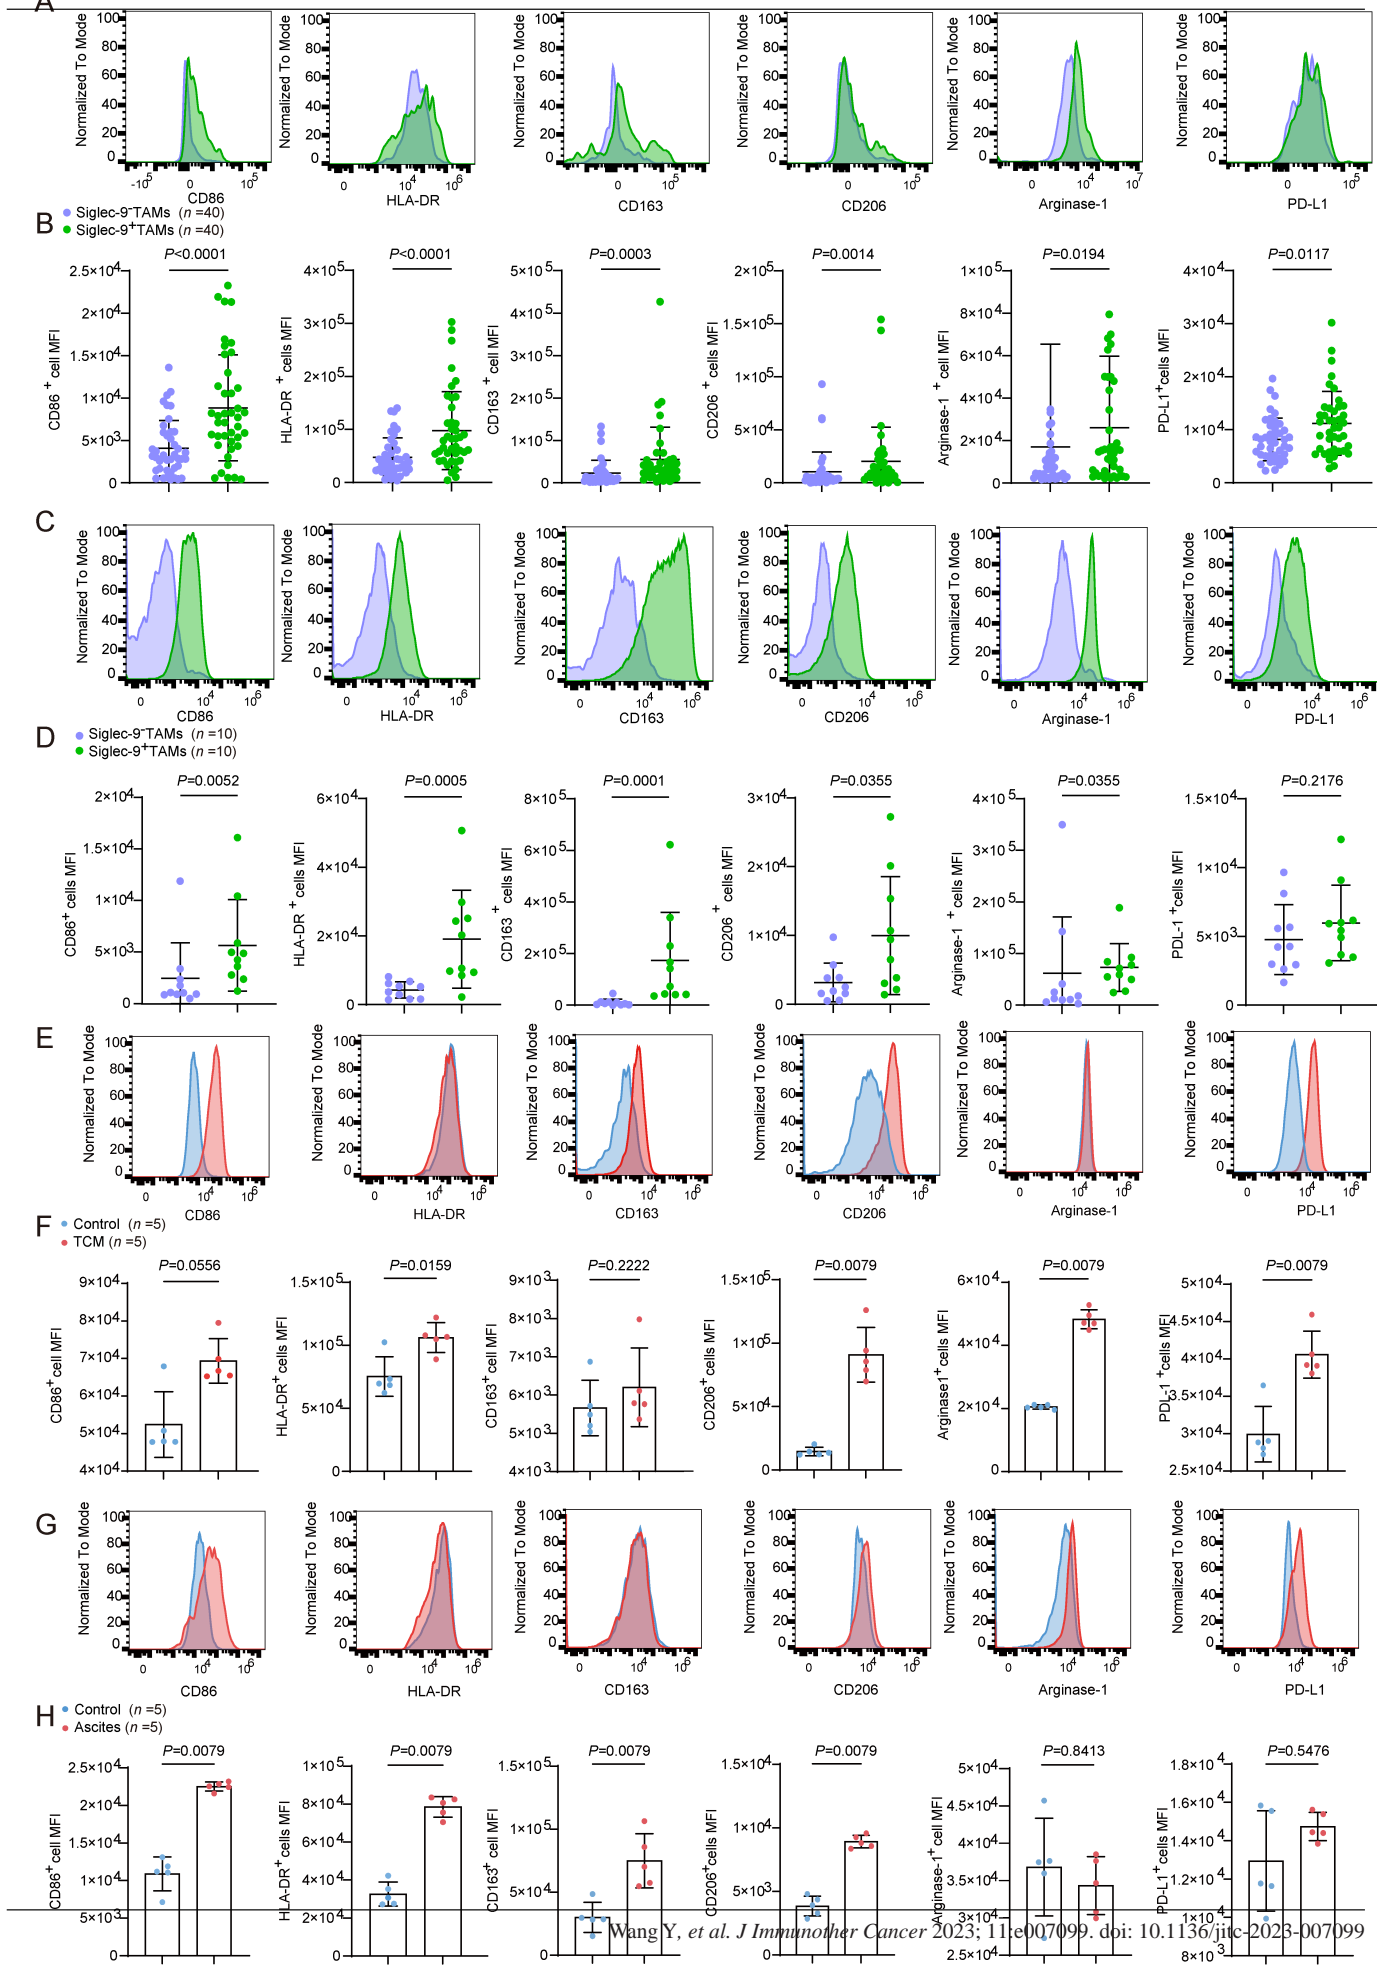

Supplement: jitc-2023-007099supp004.pdf [file jitc-2023-007099supp004.pdf]

Figure S4

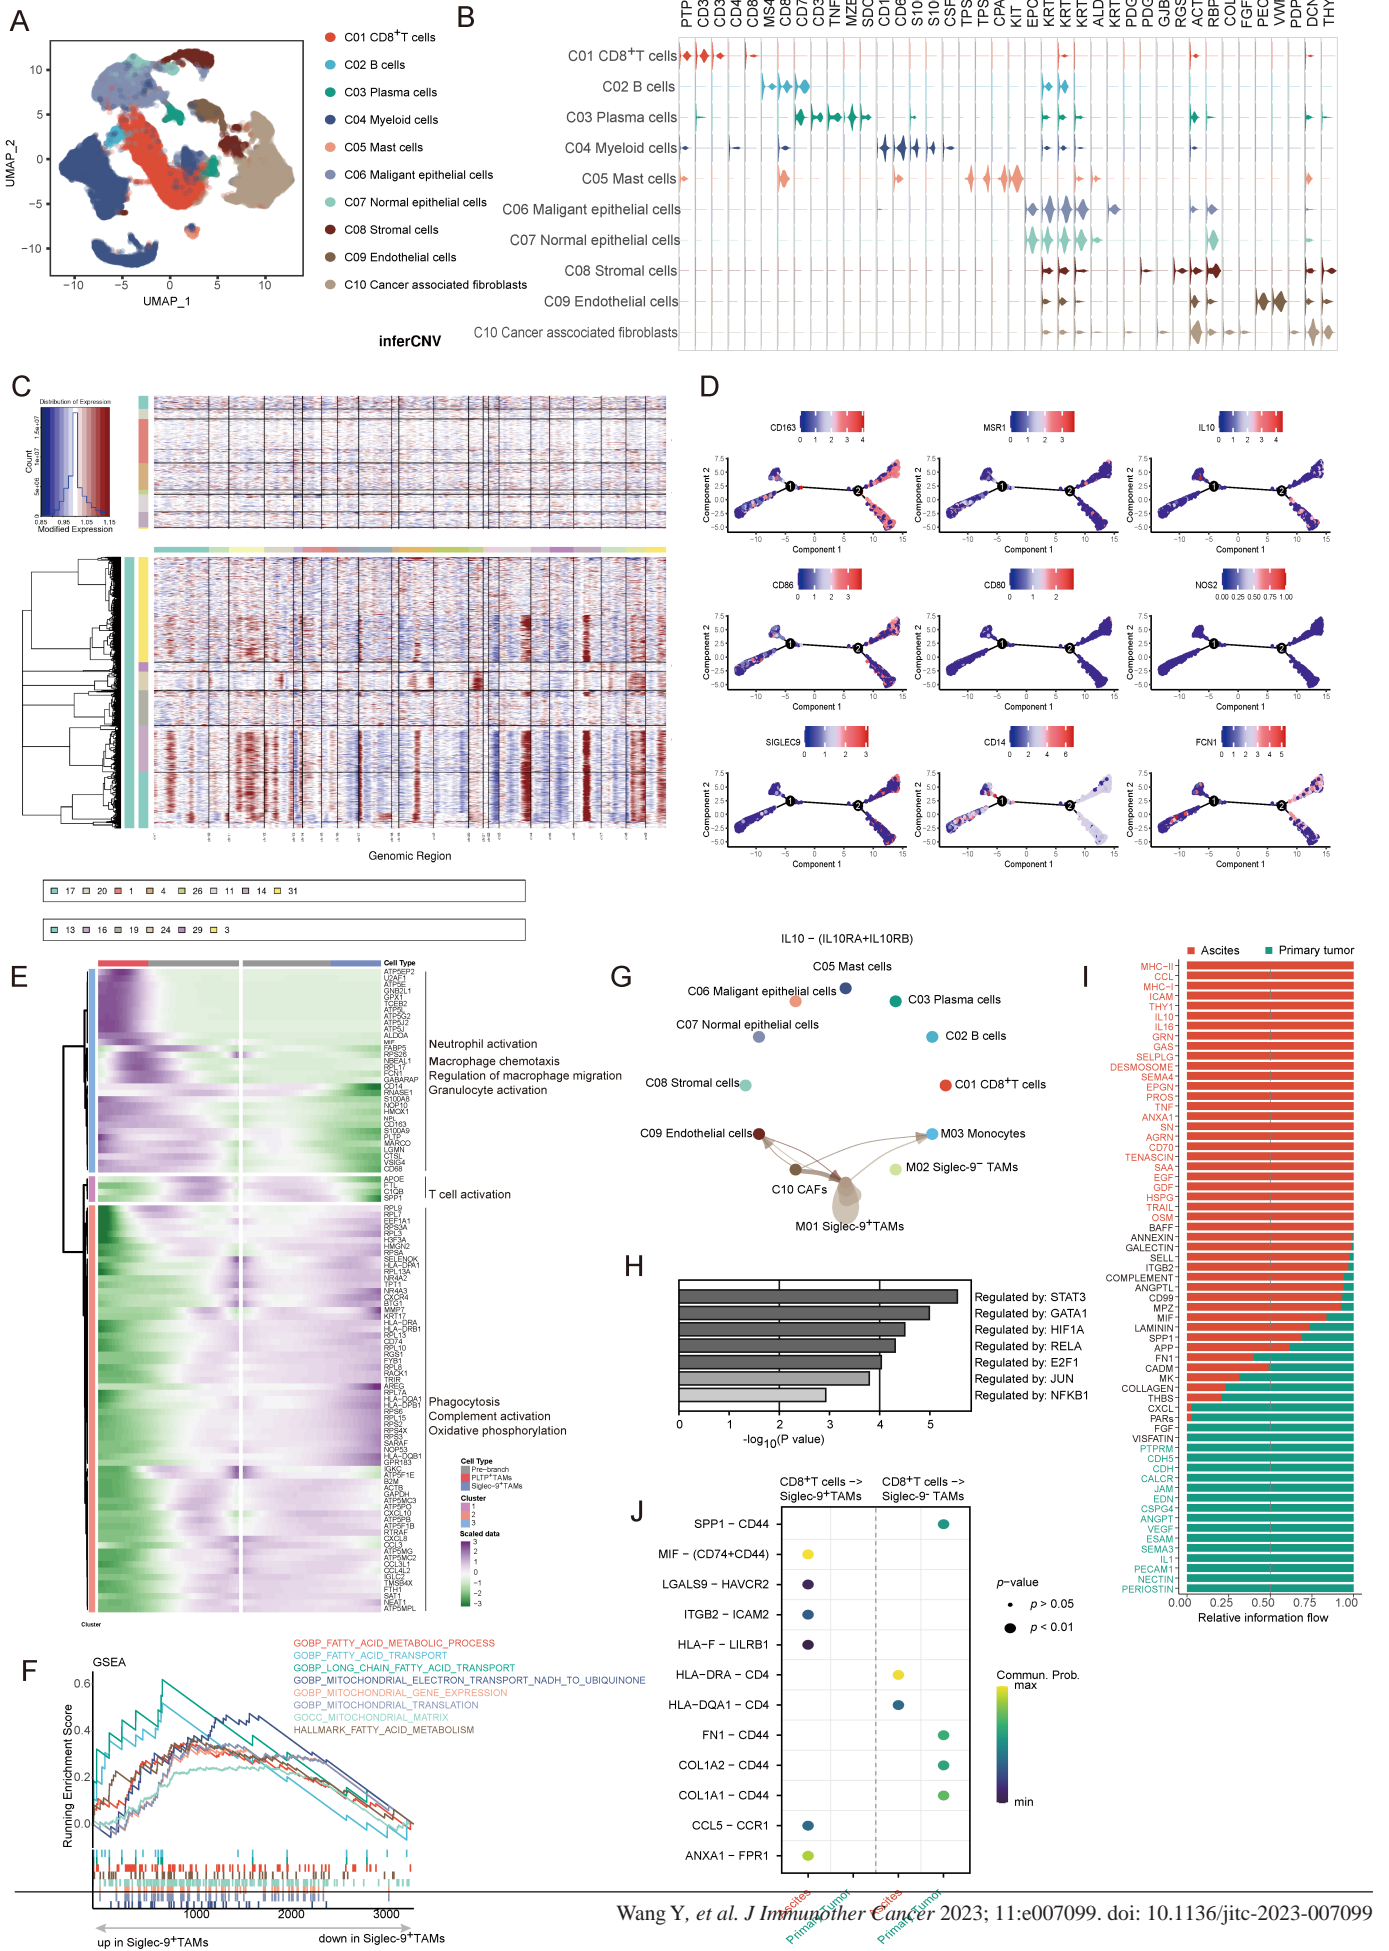

Supplement: jitc-2023-007099supp005.pdf [file jitc-2023-007099supp005.pdf]

**Figure S5** material

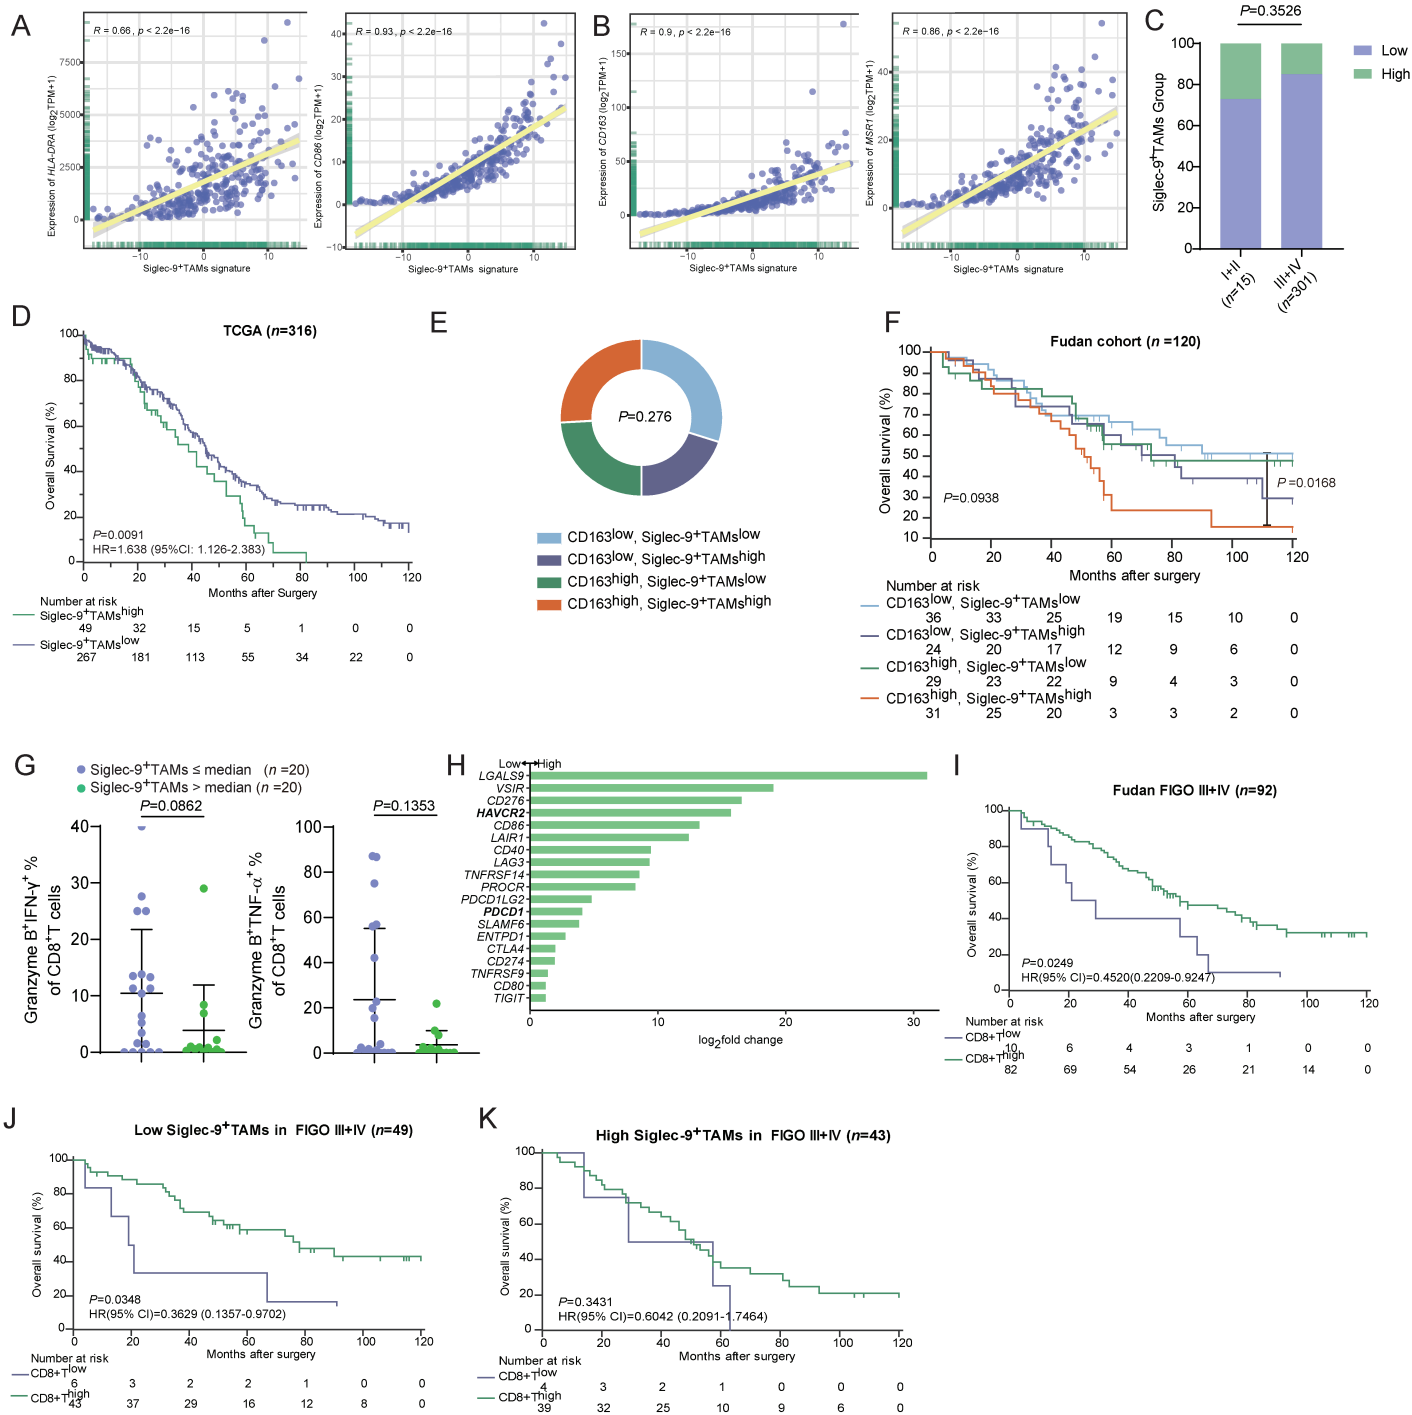

Supplement: jitc-2023-007099supp006.pdf [file jitc-2023-007099supp006.pdf]

## Figure S6

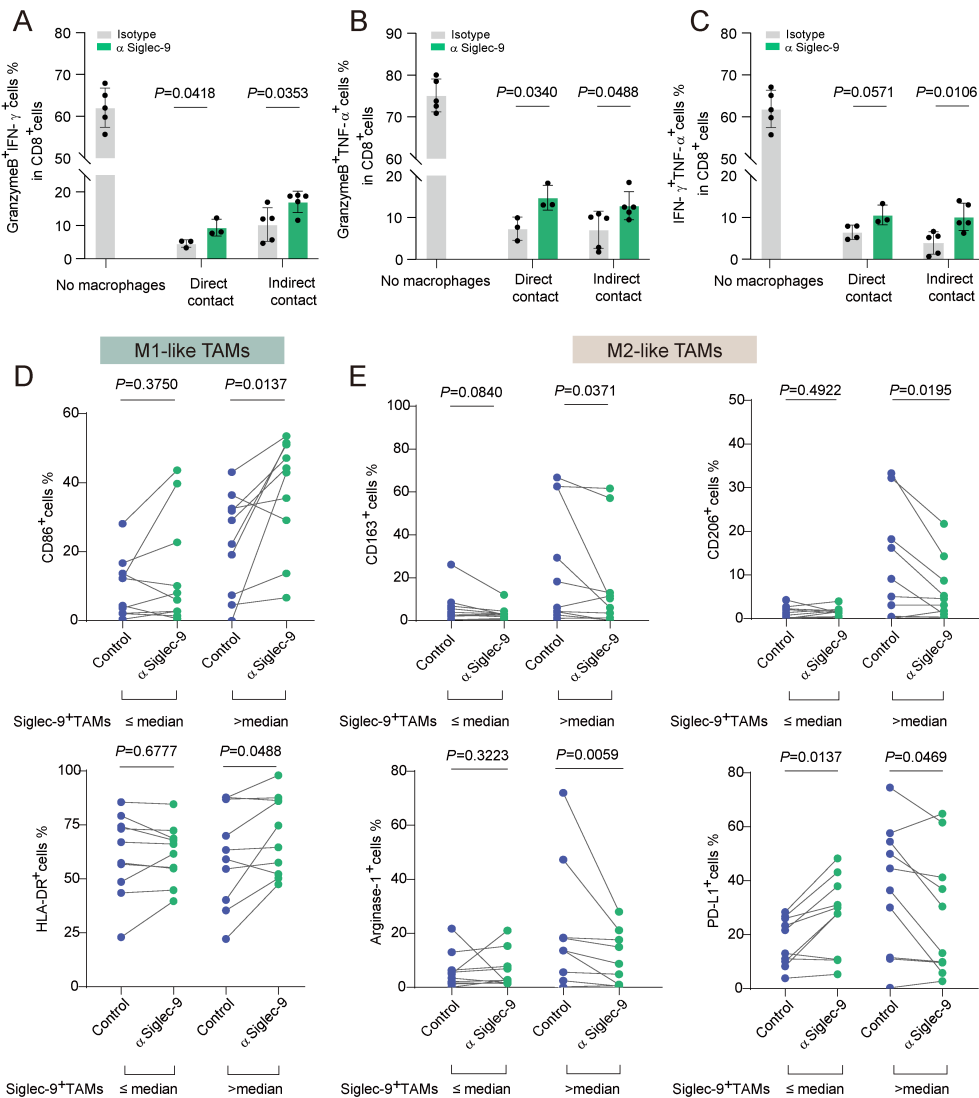

Supplement: jitc-2023-007099supp007.pdf [file jitc-2023-007099supp007.pdf]

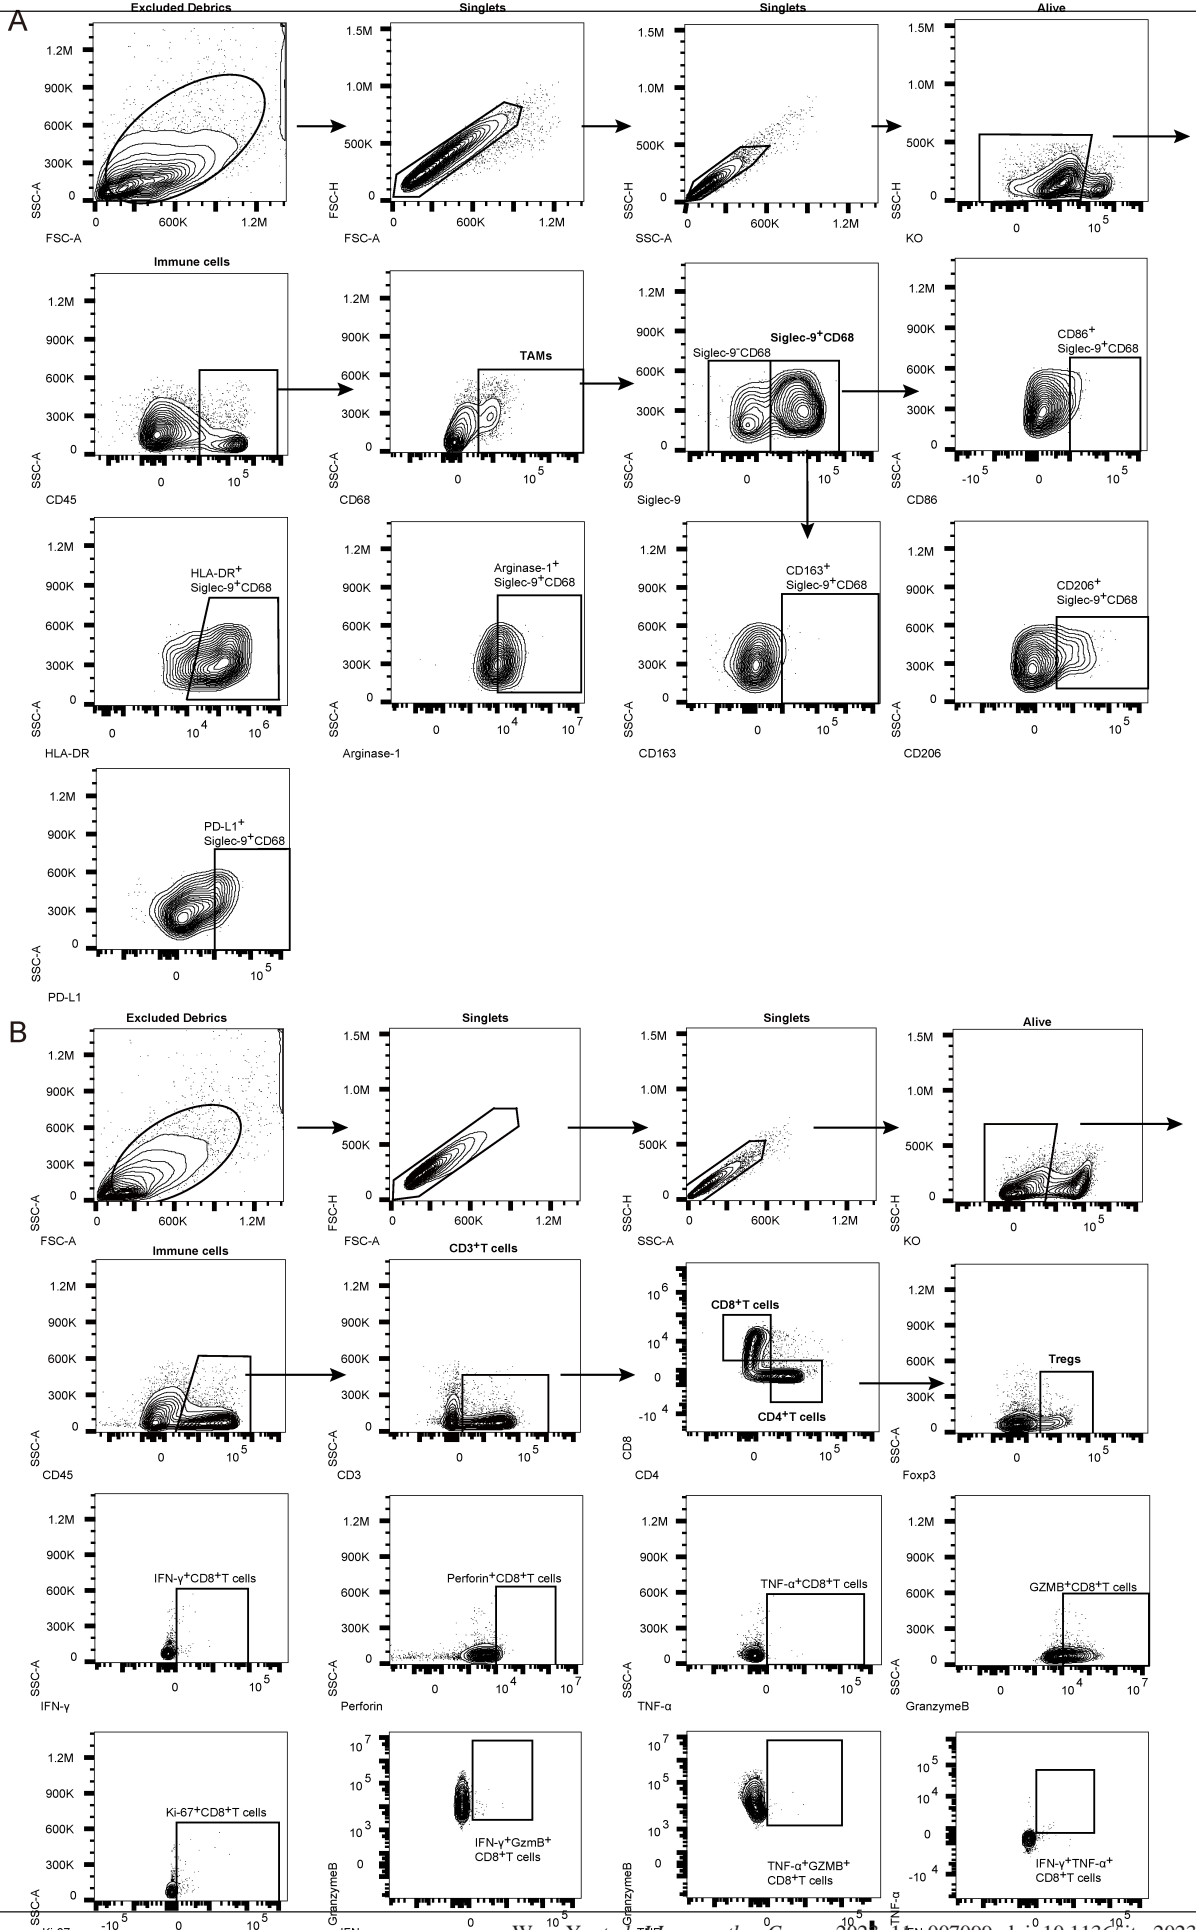

Supplement: jitc-2023-007099supp008.pdf [file jitc-2023-007099supp008.pdf]

Figure S8

A

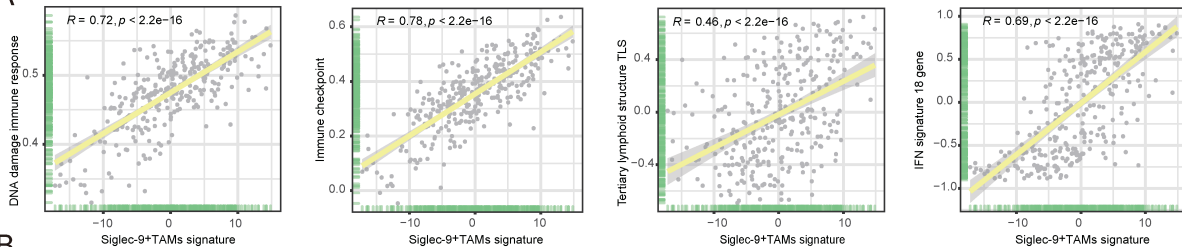

B

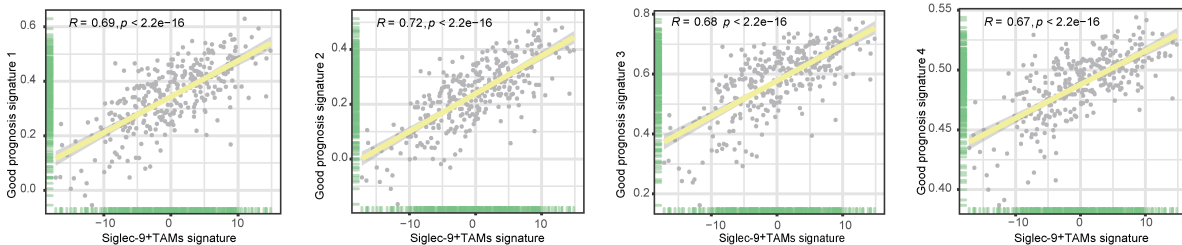

Supplement: jitc-2023-007099supp009.pdf [file jitc-2023-007099supp009.pdf]

Supplemental material  
Figure S9

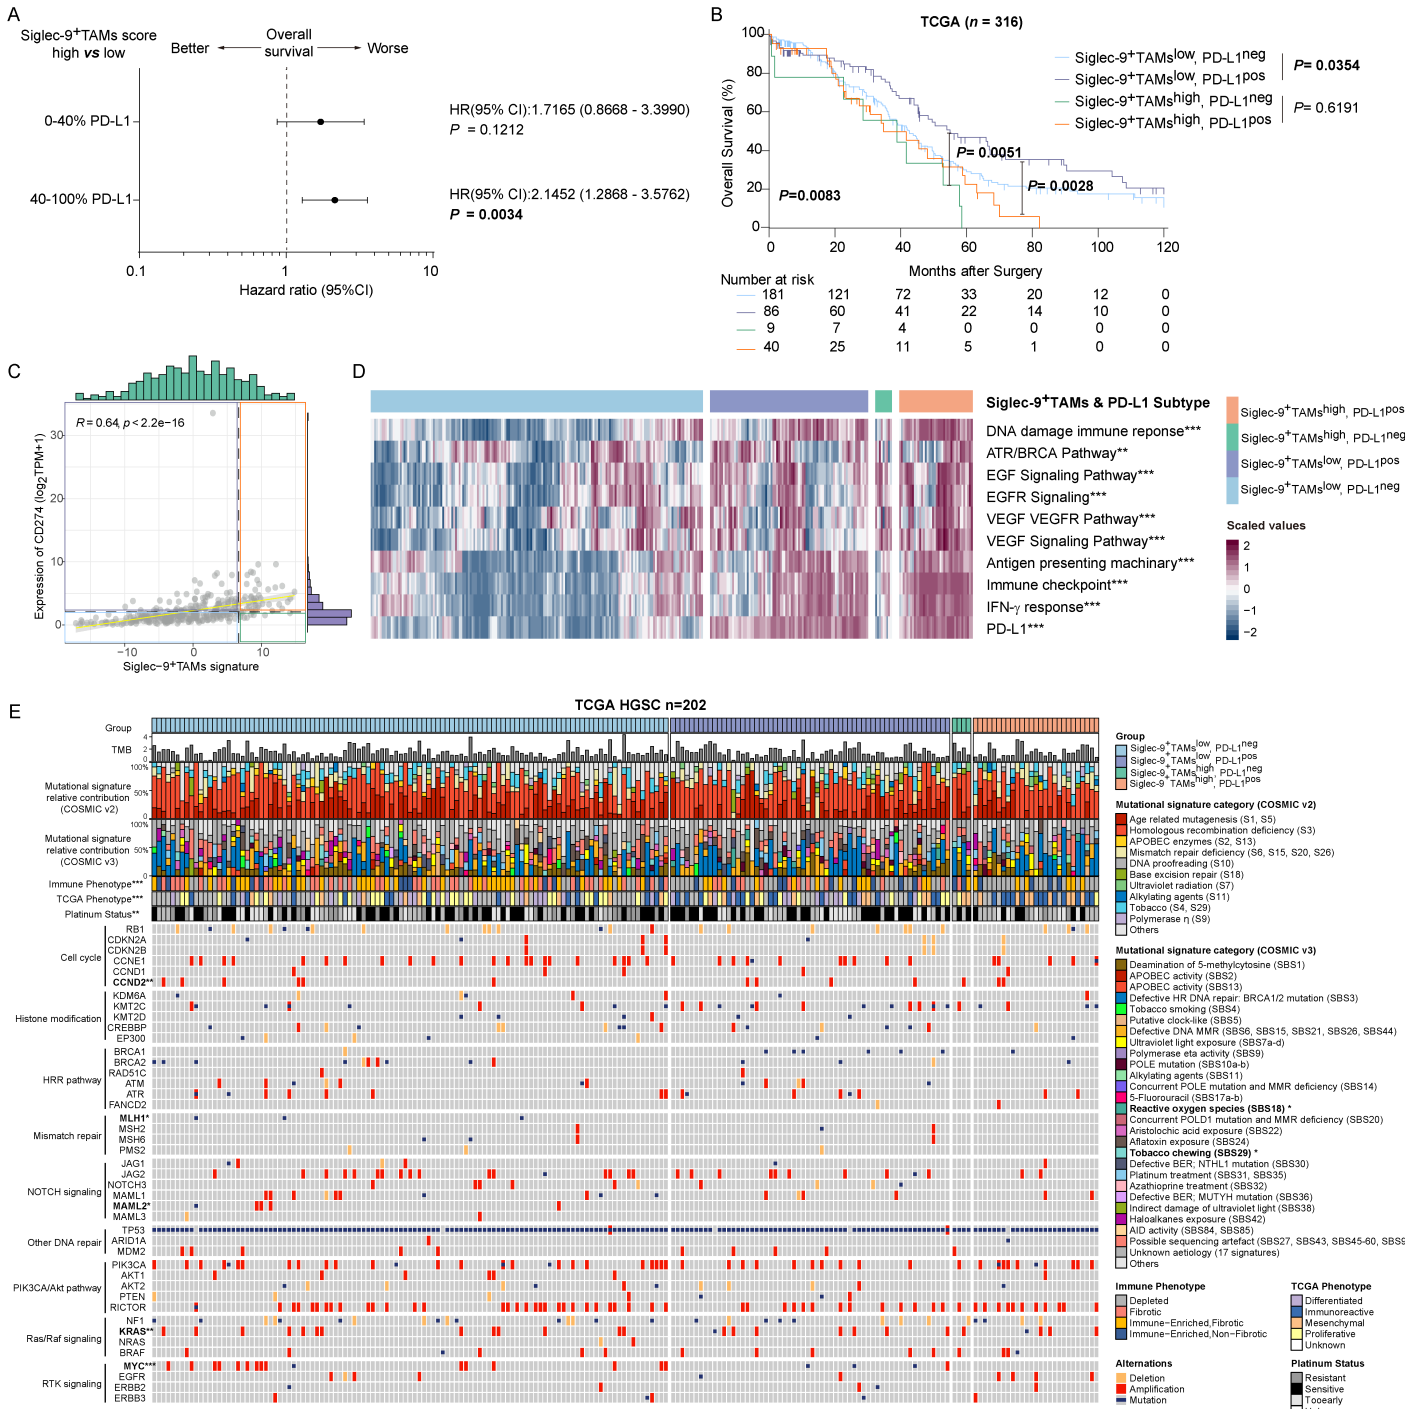

Supplement: jitc-2023-007099supp010.pdf [file jitc-2023-007099supp010.pdf]
